# Supplementary material
Source: PubMed Central journal article supplement (PMC5680778)

Fig. S3

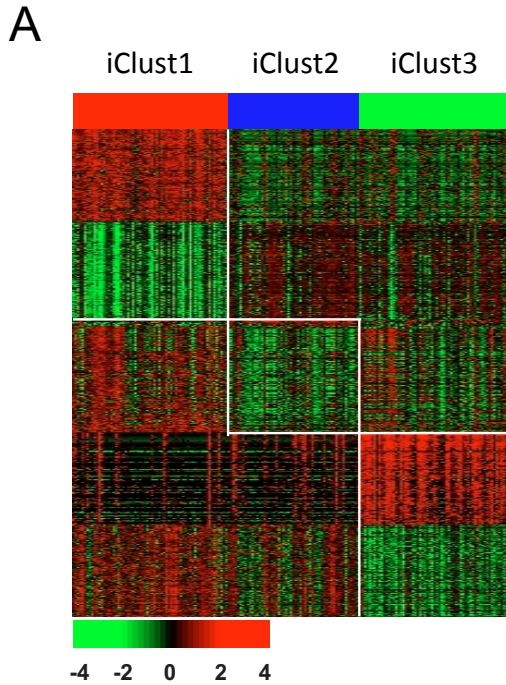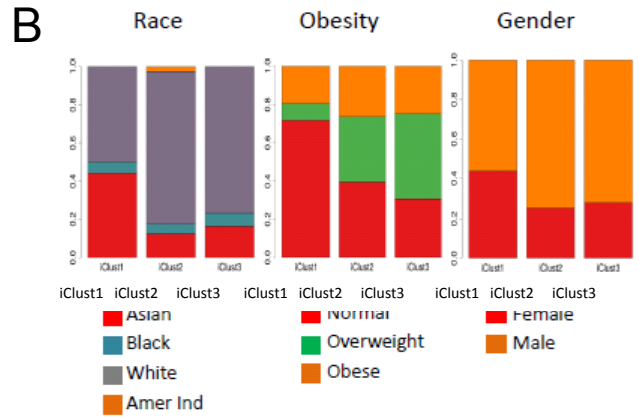

| Grade | iClust 1 | iClust 2 | iClust 3 | P=0.0006 |
|-------|----------|----------|----------|----------|
| G1    | 5(8%)    | 17(32%)  | 10(16%)  |          |
| G2    | 28(43%)  | 27(51%)  | 32(52%)  |          |
| G3    | 32(49%)  | 9(17%)   | 20(32%)  |          |

| Macrovascular Invasion | iClust 1 | iClust 2 | iClust 3 | P=0.01 |
|------------------------|----------|----------|----------|--------|
| Yes                    | 5(10%)   | 0(0%)    | 3(6%)    |        |
| Microvascular          | 18(35%)  | 7(15%)   | 18(33%)  |        |
| None                   | 29(56%)  | 39(85%)  | 33(61%)  |        |

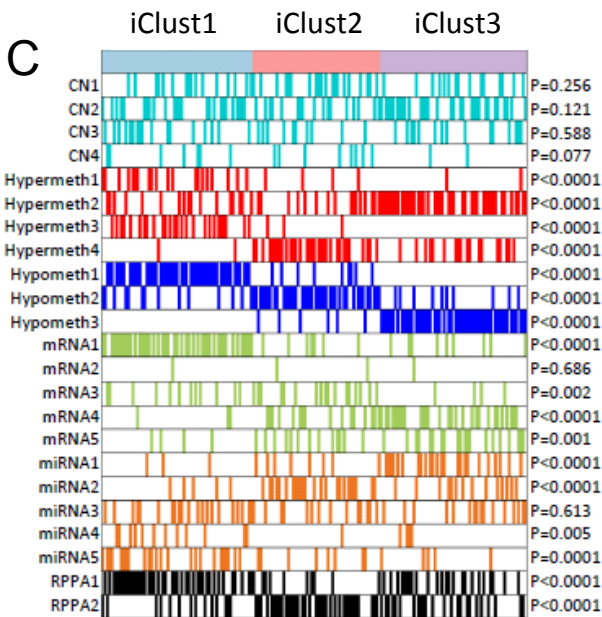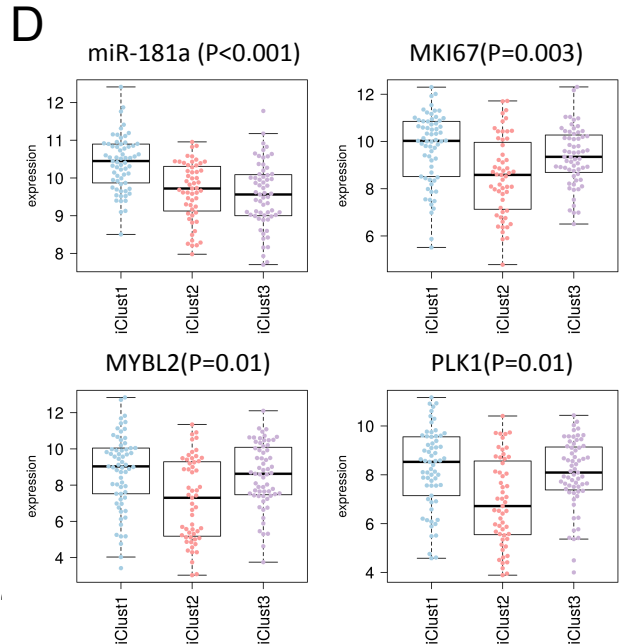

Supplement: NIHMS882929-supplement-3.pdf [file NIHMS882929-supplement-3.pdf]
