# Supplementary material
Source: PubMed Central journal article supplement (PMC5680778)
Supplement: NIHMS882929-supplement-4.pdf [file NIHMS882929-supplement-4.pdf]

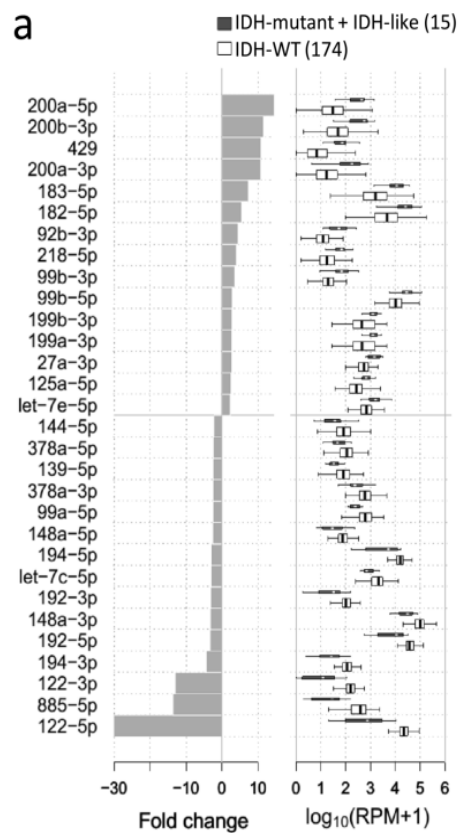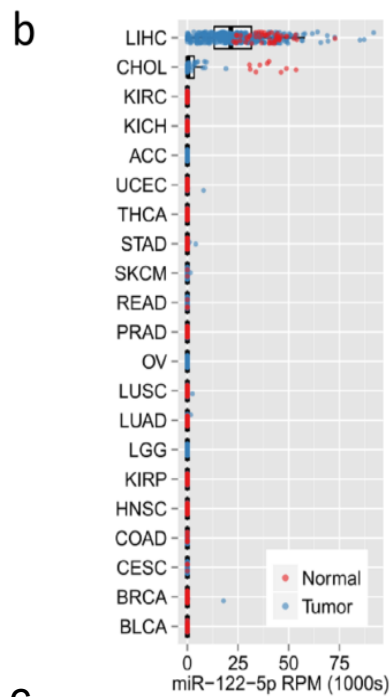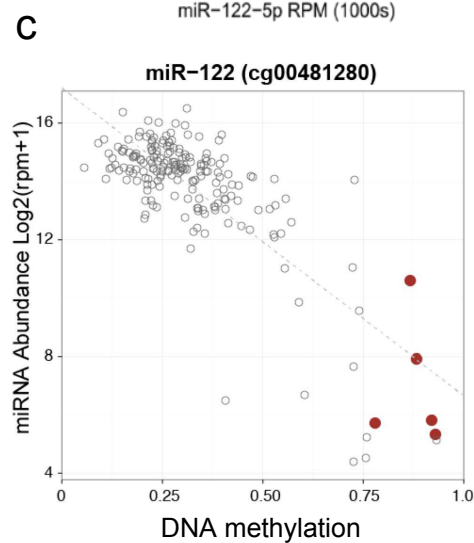

**d**

| Functionally validated target genes | FDR      | Spearman rho |
|-------------------------------------|----------|--------------|
| GIT1 28964                          | 1.77E-20 | -0.65        |
| LMNB2 84823                         | 1.01E-18 | -0.63        |
| PKM2 5315                           | 3.23E-18 | -0.62        |
| TBC1D10B 26000                      | 8.07E-16 | -0.59        |
| GYS1 2997                           | 1.80E-13 | -0.55        |
| IQGAP1 8826                         | 9.20E-13 | -0.54        |
| FAM117B 150864                      | 1.04E-12 | -0.54        |
| BAI2 576                            | 7.46E-12 | -0.52        |
| CHST12 55501                        | 5.05E-11 | -0.51        |
| ABCC10 89845                        | 8.07E-11 | -0.50        |
| ARHGAP1 392                         | 6.37E-10 | -0.48        |
| RAB6B 51560                         | 7.59E-10 | -0.48        |
| ALDOA 226                           | 1.07E-09 | -0.48        |
| UBAP2 55833                         | 2.28E-09 | -0.47        |
| C9orf86 55684                       | 2.92E-09 | -0.47        |
| ATP13A2 23400                       | 8.09E-09 | -0.46        |
| BICD1 636                           | 8.89E-09 | -0.46        |
| DSTYK 25778                         | 1.46E-08 | -0.45        |
| SLC7A1 6541                         | 1.60E-08 | -0.45        |
| DULLARD 23399                       | 6.50E-08 | -0.44        |
| FUT8 2530                           | 7.92E-08 | -0.43        |
| HIF1A 3091                          | 9.41E-08 | -0.43        |
| SEMA4D 10507                        | 1.21E-07 | -0.43        |
| SLC4A3 6508                         | 1.51E-07 | -0.43        |
| IGF1R 3480                          | 2.93E-07 | -0.42        |
| TPD52L2 7165                        | 5.10E-07 | -0.41        |
| ADAM17 6868                         | 5.36E-07 | -0.41        |
| CLIC1 1192                          | 5.97E-07 | -0.41        |
| CS 1431                             | 6.24E-07 | -0.41        |
| AKT3 10000                          | 6.85E-07 | -0.41        |
