# Supplementary material
Source: PubMed Central journal article supplement (PMC5680778)

A

| Pathway             | iCluster1 | iCluster2 | iCluster3 |
|---------------------|-----------|-----------|-----------|
| RTK/RAS/PI3K        | 22%       | 24%       | 37%       |
| TP53                | 43%       | 35%       | 48%       |
| Cell cycle          | 51%       | 80%       | 78%       |
| Altered in HA       | 9%        | 20%       | 3%        |
| WNT                 | 31%       | 56%       | 54%       |
| Chromatin modifiers | 40%       | 38%       | 32%       |
| Telomerase          | 26%       | 58%       | 62%       |

Fig. S6

% Cases with pathway alterations

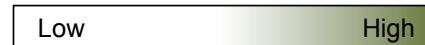

B

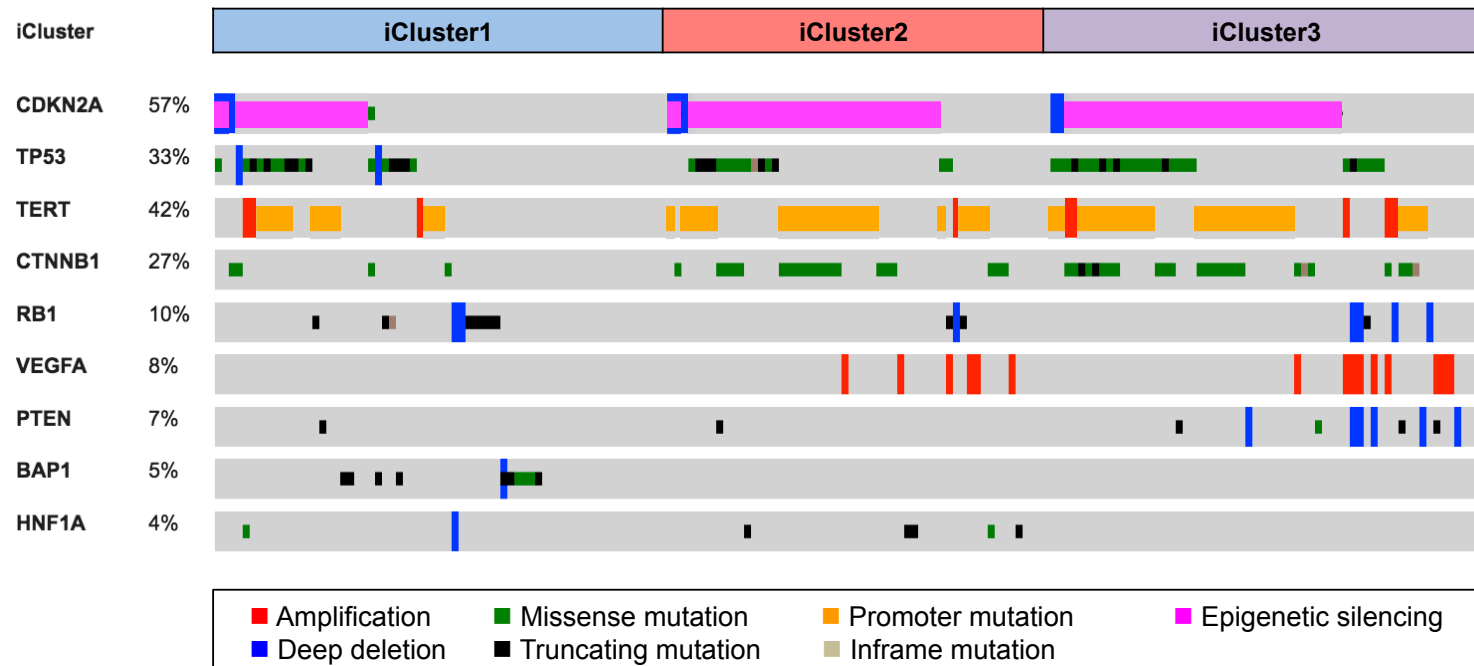

Supplement: NIHMS882929-supplement-6.pdf [file NIHMS882929-supplement-6.pdf]
