# Supplementary material
Source: PubMed Central journal article supplement (PMC5680778)

Fig. S1

A

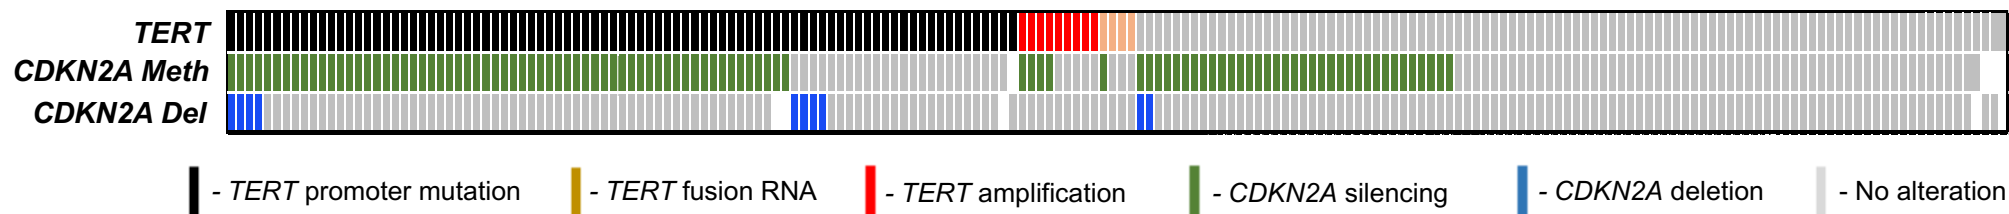

B

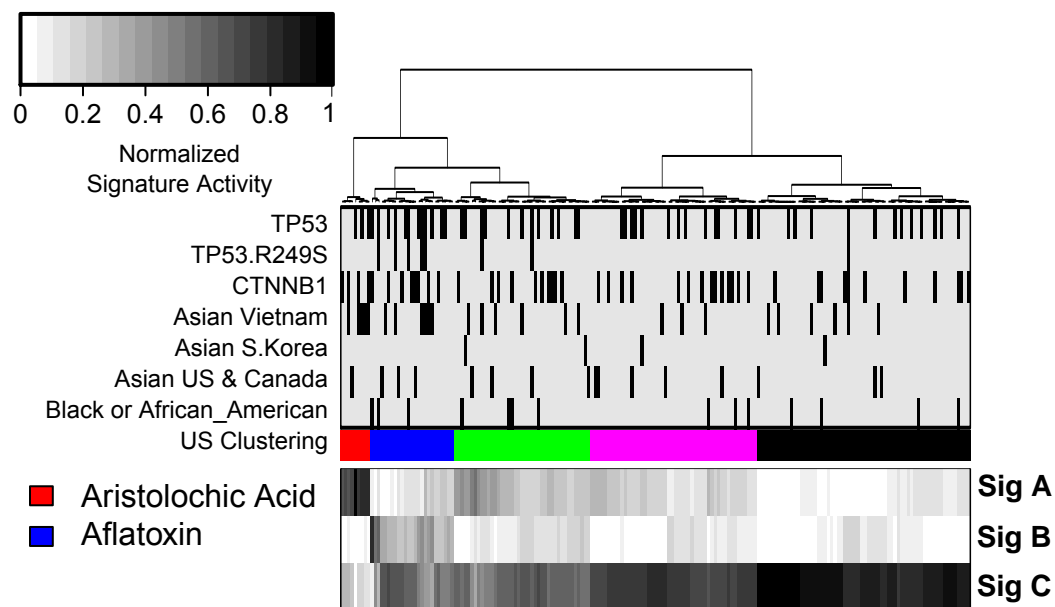

C

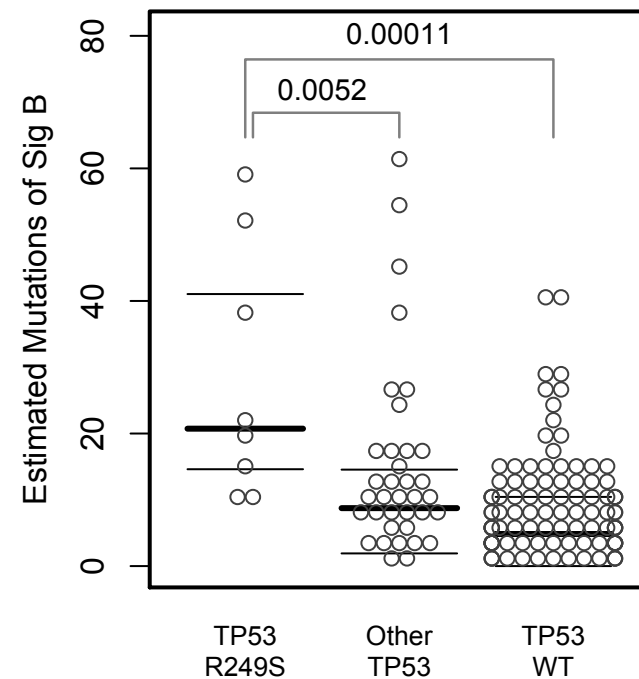

Supplement: NIHMS882929-supplement-1.pdf [file NIHMS882929-supplement-1.pdf]

Fig. S2

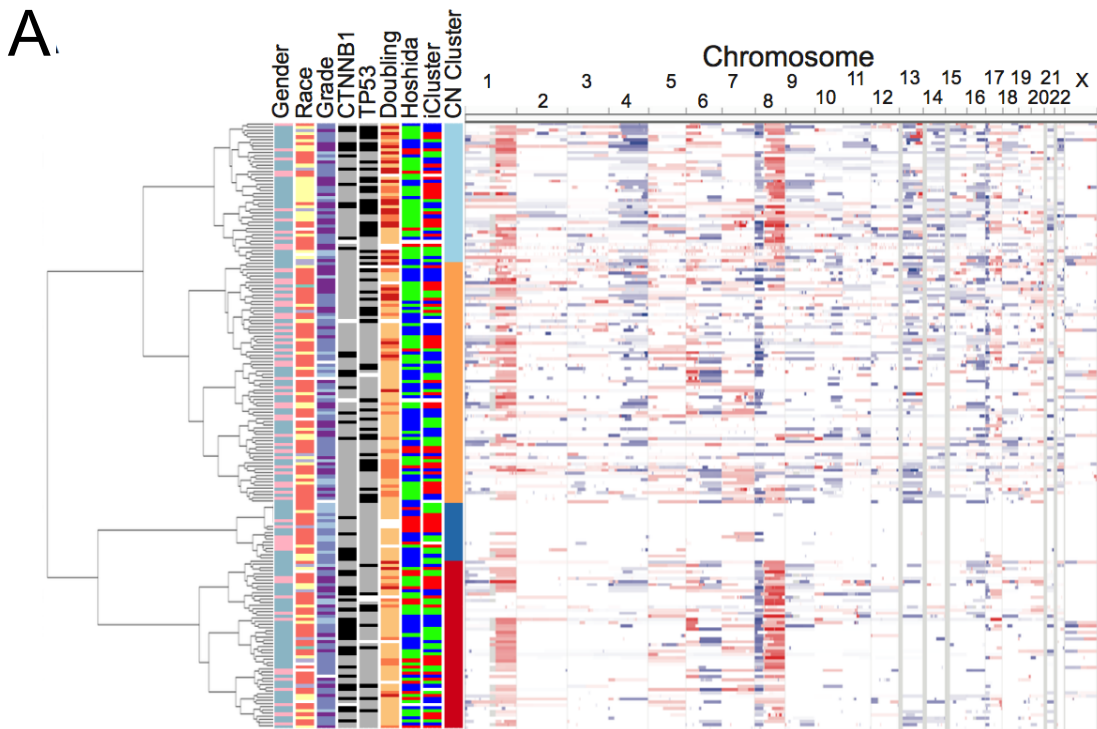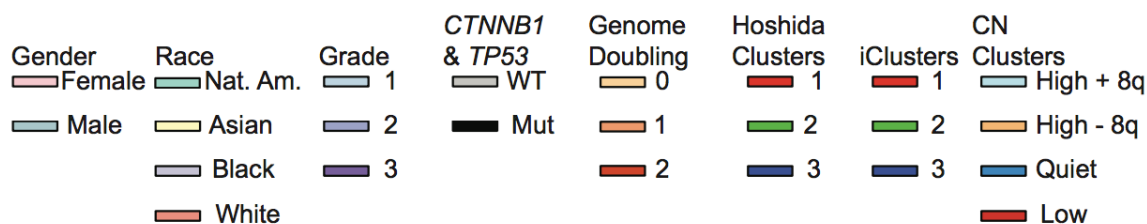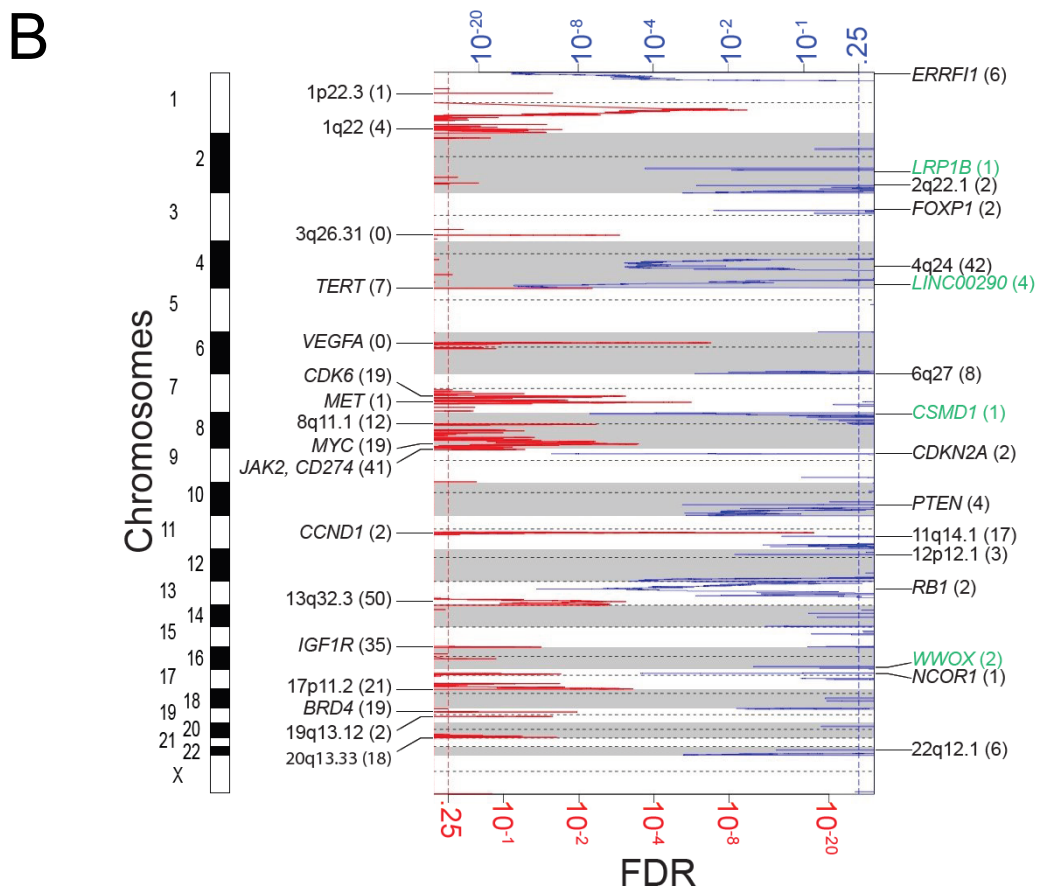

Supplement: NIHMS882929-supplement-2.pdf [file NIHMS882929-supplement-2.pdf]

Fig. S5

A

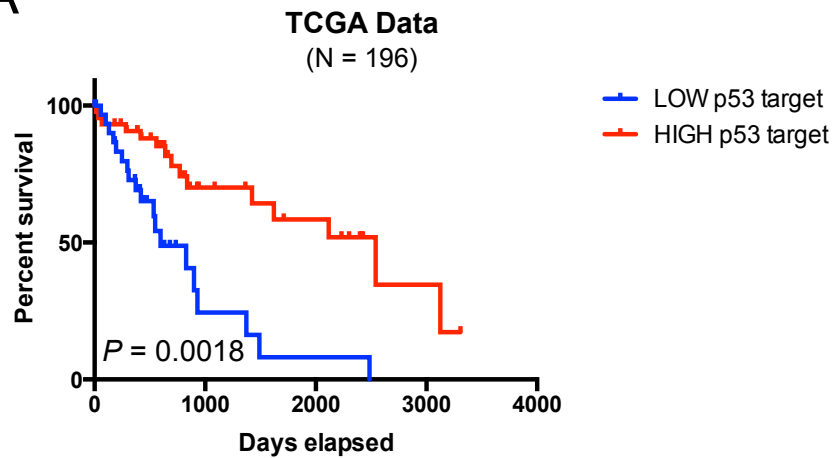

B

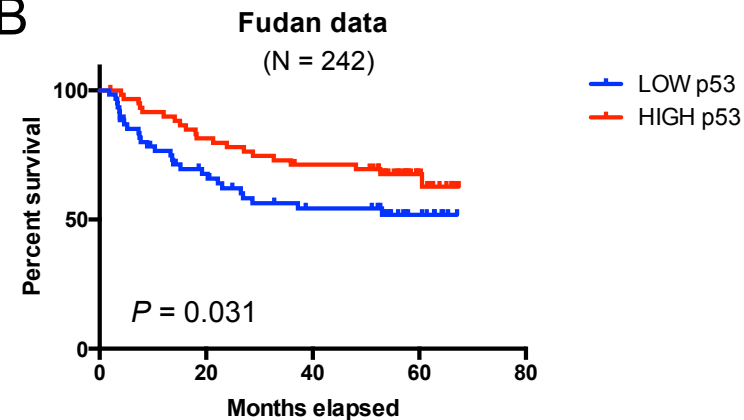

C

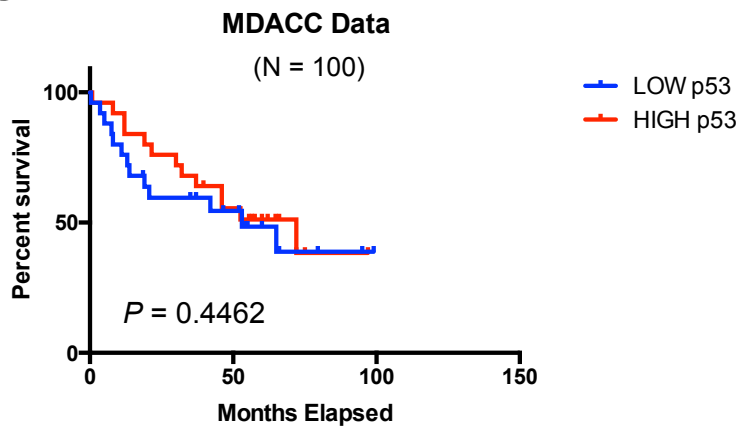

D

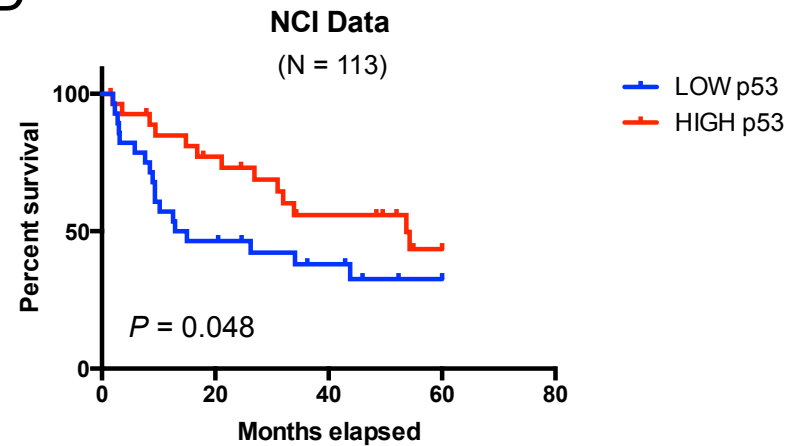

Supplement: NIHMS882929-supplement-5.pdf [file NIHMS882929-supplement-5.pdf]

Fig. S7

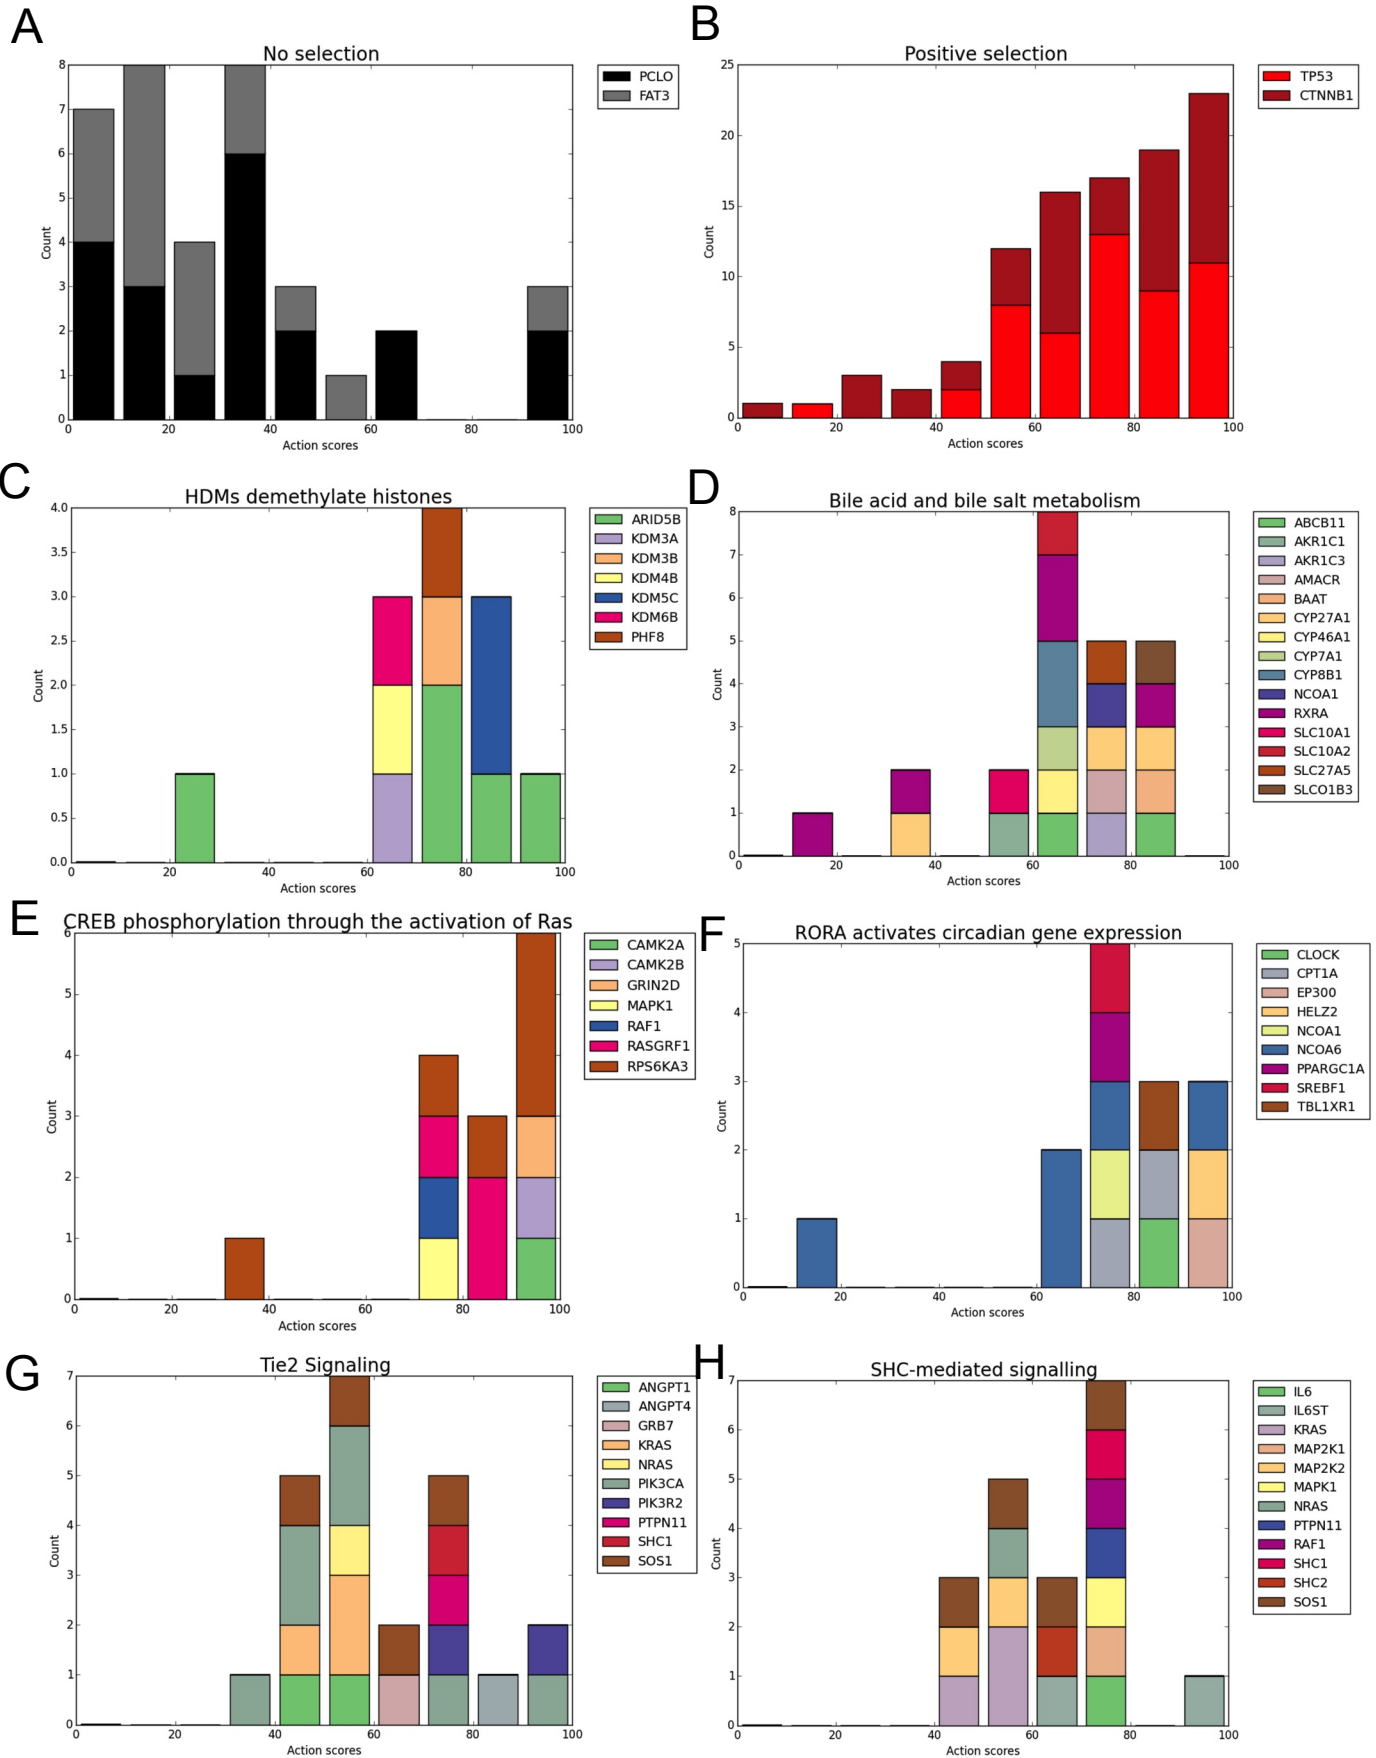

Supplement: NIHMS882929-supplement-7.pdf [file NIHMS882929-supplement-7.pdf]
